# Supplementary material
Source: Springer Nature journal article supplement (https://www.springermedizin.de/resource/supplementary/13058_2012_3138_MOESM1_ESM.pdf/9703154)

## CellSearch

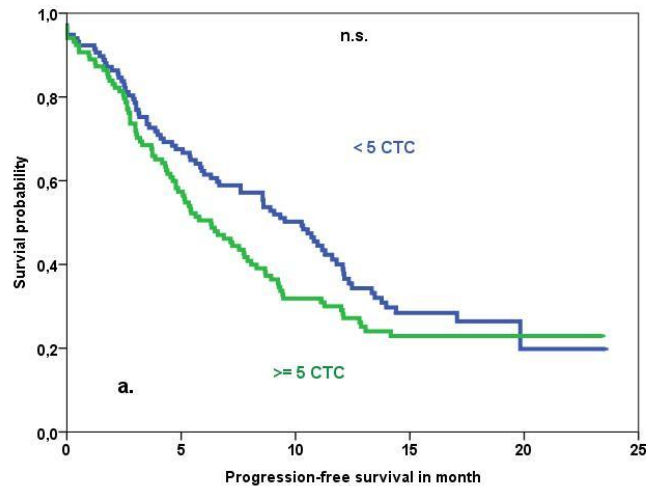

## AdnaTest Breast

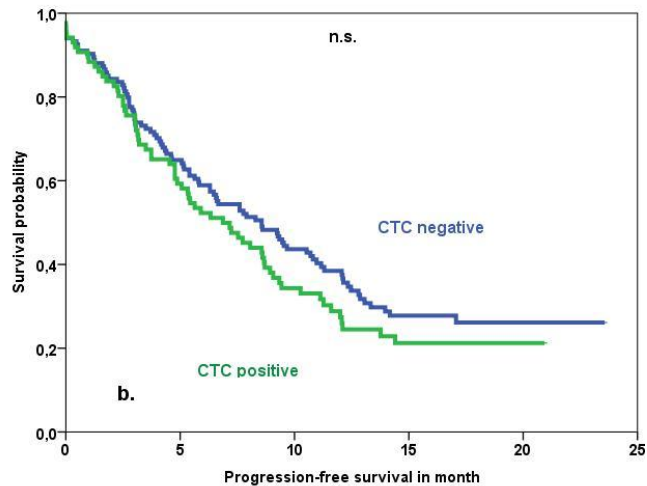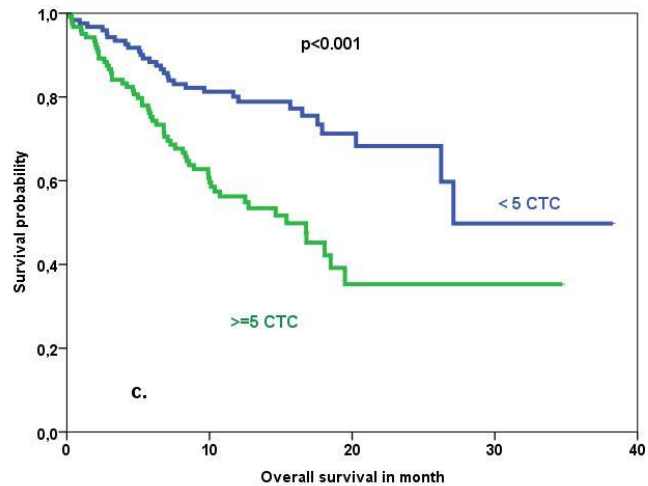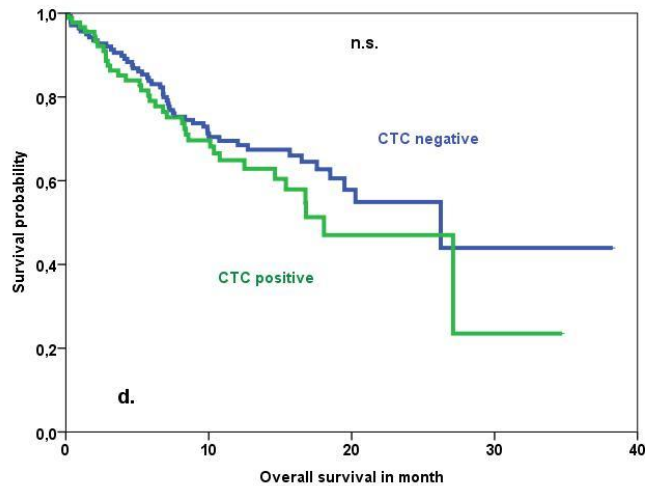

Supplement: MOESM1 [file 9703154]
